# Supplementary material for: Characteristics and correlates of sleep duration, daytime napping, snoring and insomnia symptoms among 0.5 million Chinese men and women
Source: PubMed Central journal article supplement (PMC5869948; doi:10.1016/j.sleep.2017.11.1131), 2018-04

**Web Figure 1: Adjusted ORs for insomnia symptoms in individuals with (A) short sleep duration and (B) long sleep duration by mental health conditions and physical illness**

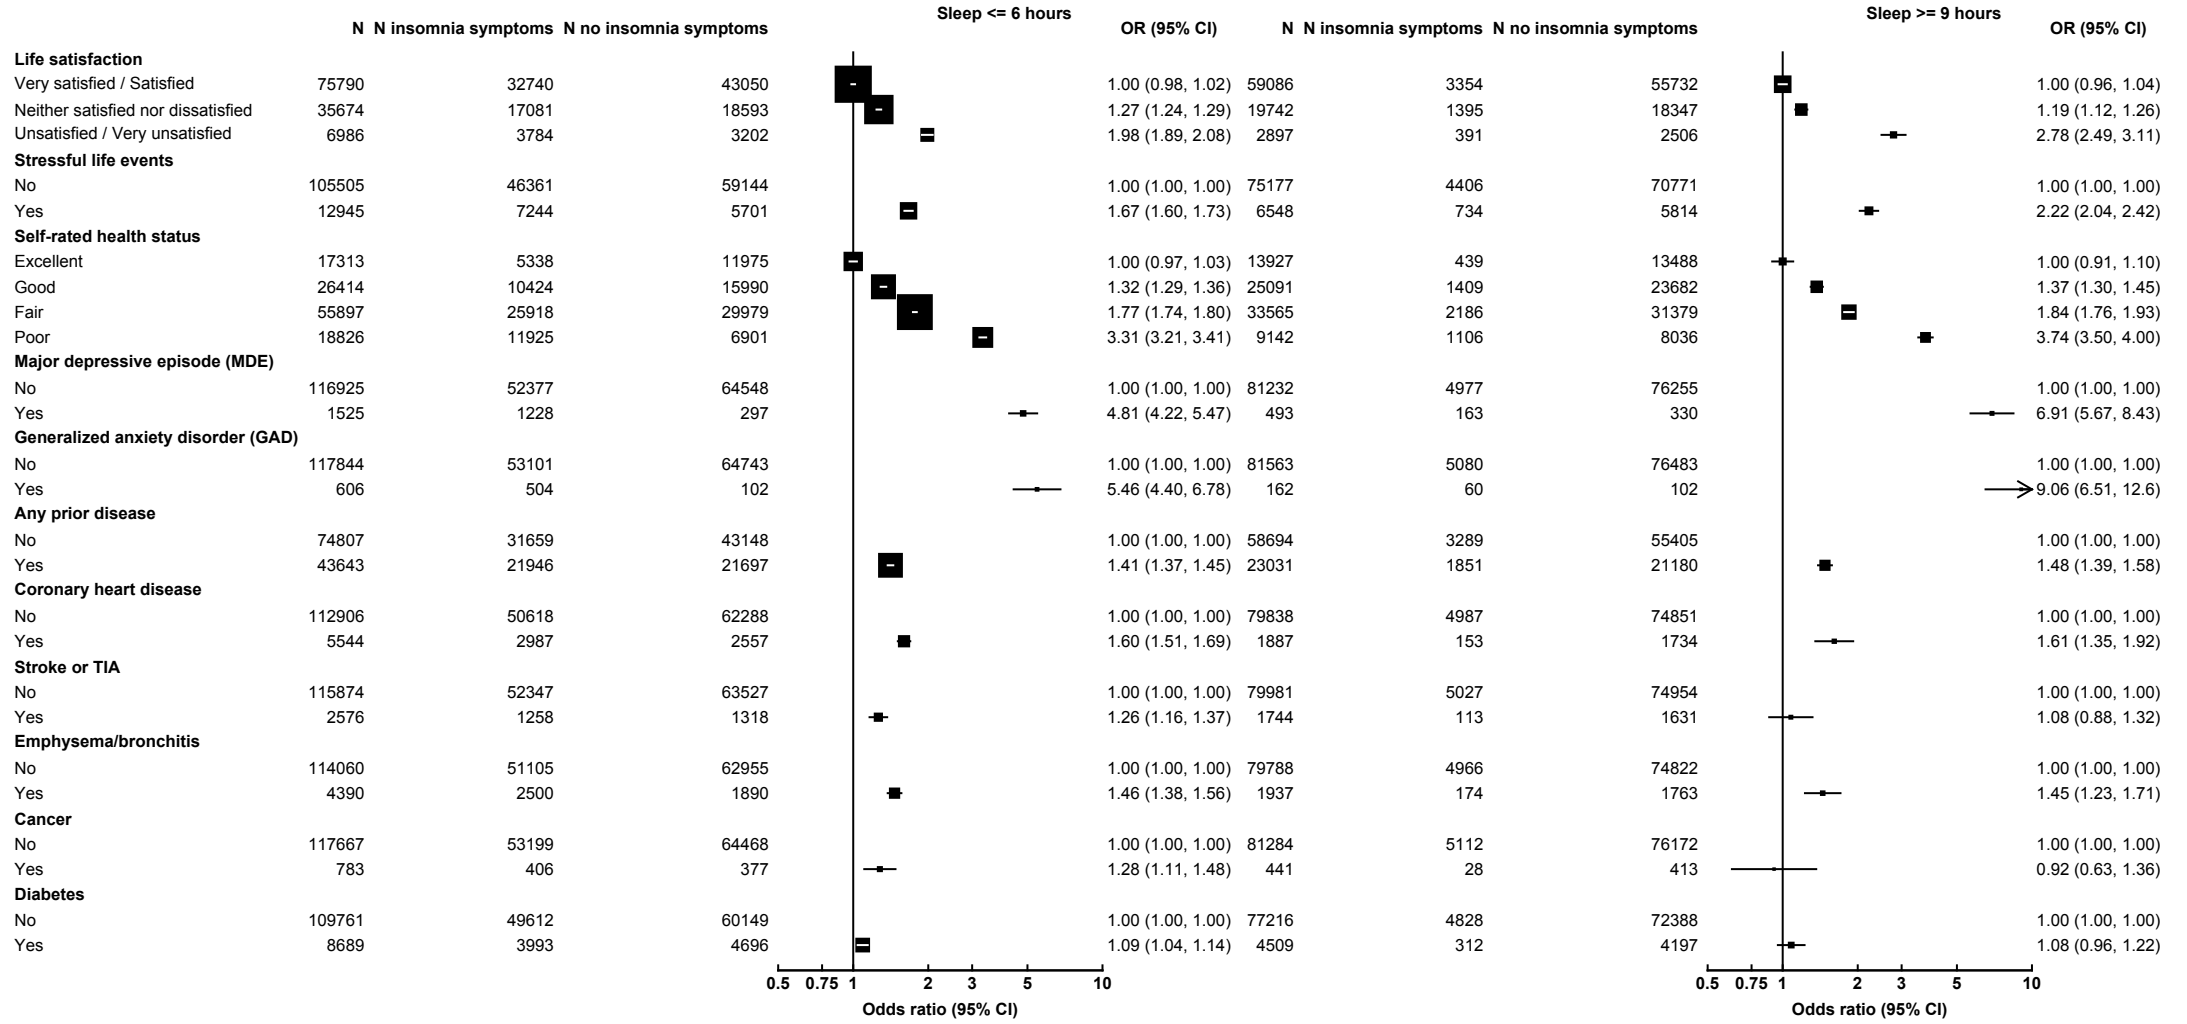

Supplement: mmc2.pdf [file mmc2.pdf]
