# Supplementary material for: Characteristics and correlates of sleep duration, daytime napping, snoring and insomnia symptoms among 0.5 million Chinese men and women
Source: PubMed Central journal article supplement (PMC5869948; doi:10.1016/j.sleep.2017.11.1131), 2018-04

**Web figure 1: Proportion with insomnia symptoms by sleep duration adjusted for region**

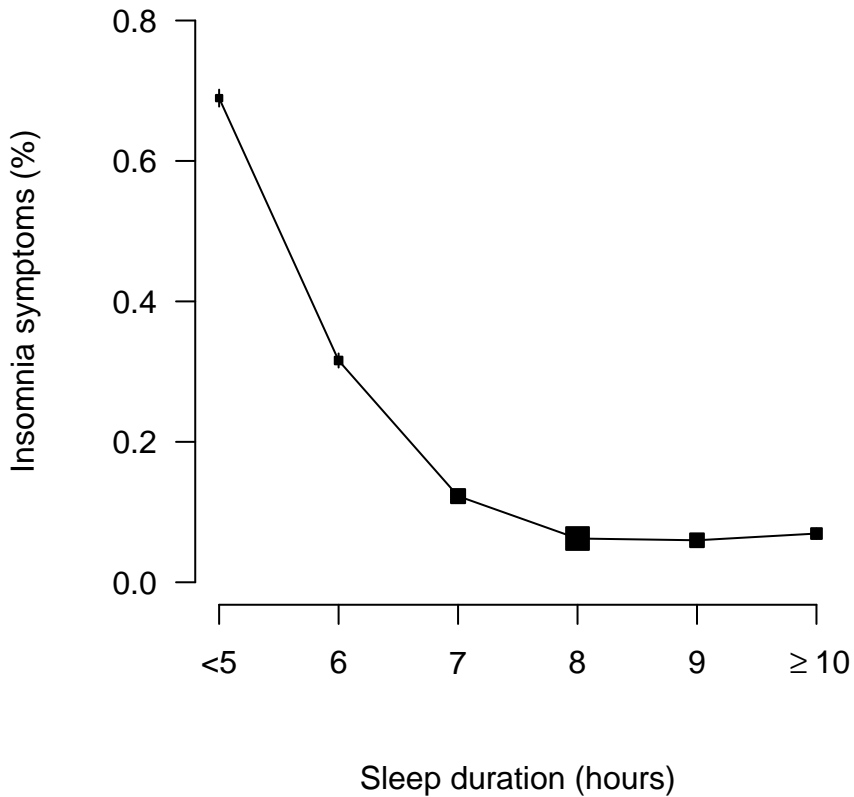

Supplement: mmc3.pdf [file mmc3.pdf]
